# Supplementary material for: Gradual drying of permafrost peat decreases carbon dioxide production in drier peat plateaus but not in wetter fens and bogs
Source: Copernicus journal article supplement (doi:10.5194/soil-11-371-2025), 2025-05-14
Supplement: Supplementary file 1 [file soil-11-371-2025-supplement.pdf]

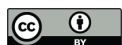

*Supplement of*

## **Gradual drying of permafrost peat decreases carbon dioxide production in drier peat plateaus but not in wetter fens and bogs**

**Aelis Spiller et al.**

*Correspondence to:* Cynthia M. Kallenbach ([cynthia.kallenbach@mcgill.ca](mailto:cynthia.kallenbach@mcgill.ca))

The copyright of individual parts of the supplement might differ from the article licence.

**Table S1.** Lutose, Alberta Canada site characteristics and peat properties for two transects across a thaw gradient where peat samples were collected for the experimental drying incubation. For the peat moisture, total carbon (TC), total nitrogen (TN), C:N,  $\delta^{13}\text{C}$ ,  $\delta^{15}\text{N}$ , ammonium, and nitrate, the mean and standard error from initial peat samples are shown with their one-way ANOVA model p-values. Letters that are different indicate a significant difference among transect features, n=4.

|                                        | <b>Transect 1</b>                                                                           |                                                      |                                                                                                                                | <b>Transect 2</b>                                                                                                                                 |                                    |                                                                                                                                                       | <b>p-value</b> |
|----------------------------------------|---------------------------------------------------------------------------------------------|------------------------------------------------------|--------------------------------------------------------------------------------------------------------------------------------|---------------------------------------------------------------------------------------------------------------------------------------------------|------------------------------------|-------------------------------------------------------------------------------------------------------------------------------------------------------|----------------|
|                                        | Mature Bog                                                                                  | Young Bog                                            | Peat Plateau 1                                                                                                                 | Fen Center                                                                                                                                        | Fen Edge                           | Peat Plateau 2                                                                                                                                        |                |
| Vegetation                             | <i>Sphagnum fuscum</i> ,<br><i>Chamaedaphne calyculata</i> ,<br><i>Eriophorum vaginatum</i> | <i>Sphagnum riparium</i> ,<br><i>Carex aquatilis</i> | <i>Cladonia lichens</i> ,<br><i>Sphagnum fuscum</i> ,<br><i>Rhododendron groenlandicum</i> ,<br><i>Chamaedaphne calyculata</i> | Sedge dominated,<br><i>Comarum palustre</i> ,<br><i>Menyanthes trifoliata</i> ,<br>Gallium species,<br>cottongrass,<br>Sphagnum, and brown mosses | Mostly sphagnum amongst the sedges | <i>Cladonia lichens</i> , <i>Picea mariana</i> ,<br><i>Sphagnum fuscum</i> ,<br><i>Rhododendron groenlandicum</i> ,<br><i>Chamaedaphne calyculata</i> |                |
| Peat pH                                | 4.23                                                                                        | 4.65                                                 | 4.13                                                                                                                           | 6.16                                                                                                                                              | 5.2                                | 4.4                                                                                                                                                   |                |
| Water table depth                      | 20-35 cm                                                                                    | 8-13 cm                                              | no water table                                                                                                                 | 1 cm                                                                                                                                              | 5-10 cm                            | no water table                                                                                                                                        |                |
| Peat moisture (%)                      | 91.0 <sup>a</sup>                                                                           | 95.4 <sup>a</sup>                                    | 79.8 <sup>b</sup>                                                                                                              | 90.5 <sup>a</sup>                                                                                                                                 | 93.2 <sup>a</sup>                  | 72.5 <sup>b</sup>                                                                                                                                     | <0.0001        |
| TC peat (%)                            | 44.2±0.1 <sup>b</sup>                                                                       | 43.2±0.5 <sup>b</sup>                                | 45.5±0.9 <sup>ab</sup>                                                                                                         | 45.1±0.4 <sup>ab</sup>                                                                                                                            | 43.1±0.8 <sup>b</sup>              | 48.9±2.0 <sup>a</sup>                                                                                                                                 | <0.005         |
| TN peat %                              | 0.52±0.04 <sup>d</sup>                                                                      | 0.83±0.06 <sup>c</sup>                               | 0.74±0.07 <sup>cd</sup>                                                                                                        | 2.44±0.07 <sup>a</sup>                                                                                                                            | 1.80±0.09 <sup>b</sup>             | 1.00±0.07 <sup>c</sup>                                                                                                                                | <0.0001        |
| C:N peat                               | 88.7±6 <sup>a</sup>                                                                         | 53.5±3 <sup>b</sup>                                  | 65.5±6 <sup>b</sup>                                                                                                            | 18.6±0.6 <sup>c</sup>                                                                                                                             | 24.3±1 <sup>c</sup>                | 51.4±5 <sup>b</sup>                                                                                                                                   | <0.0001        |
| $\delta^{13}\text{C}$ peat             | -29.76±0.5 <sup>ab</sup>                                                                    | -28.85±0.1 <sup>a</sup>                              | -27.90±0.4 <sup>a</sup>                                                                                                        | -25.95±0.3 <sup>d</sup>                                                                                                                           | -26.08±0.1 <sup>cd</sup>           | -26.88±0.2 <sup>bc</sup>                                                                                                                              | <0.0001        |
| $\delta^{15}\text{N}$ peat             | -3.98±0.6 <sup>c</sup>                                                                      | -2.58±0.7 <sup>bc</sup>                              | -0.80±1.2 <sup>ab</sup>                                                                                                        | 0.53±0.5 <sup>a</sup>                                                                                                                             | -0.44±0.4 <sup>ab</sup>            | -0.20±0.4 <sup>ab</sup>                                                                                                                               | <0.0001        |
| Ammonium (µg g <sup>-1</sup> dry peat) | 5.7±1.3 <sup>a</sup>                                                                        | 11.2±4.1 <sup>a</sup>                                | 3.3±0.8 <sup>c</sup>                                                                                                           | 3.8±0.5 <sup>bc</sup>                                                                                                                             | 5.7±1.2 <sup>a</sup>               | 3.3±0.6 <sup>c</sup>                                                                                                                                  | <0.0001        |
| Nitrate (µg g <sup>-1</sup> dry peat)  | 5.9±0.6 <sup>b</sup>                                                                        | 7.8±0.8 <sup>a</sup>                                 | 3.9±0.8 <sup>cd</sup>                                                                                                          | 4.4±0.5 <sup>c</sup>                                                                                                                              | 5.7±0.5 <sup>b</sup>               | 2.7±0.4 <sup>d</sup>                                                                                                                                  | <0.0001        |

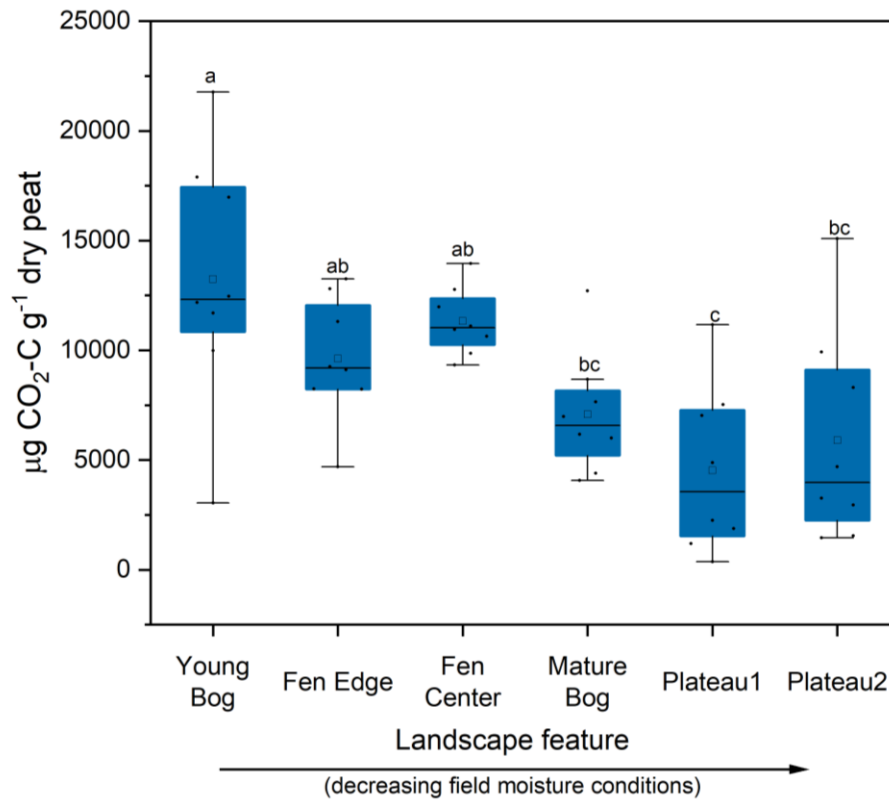

**Figure S1.** Cumulative CO<sub>2</sub> production by landscape feature after the two-week incubation ordered from high to low *in situ* peat moisture and averaged across moisture treatments. Wet treatments were incubated at field moisture conditions, and dry treatments were incubated under gradual drying. Horizontal lines show the median (n=8), open squares are the mean, and boxes show the 25<sup>th</sup> and 75<sup>th</sup> percentiles. Means that do not share a same letter are significantly different.

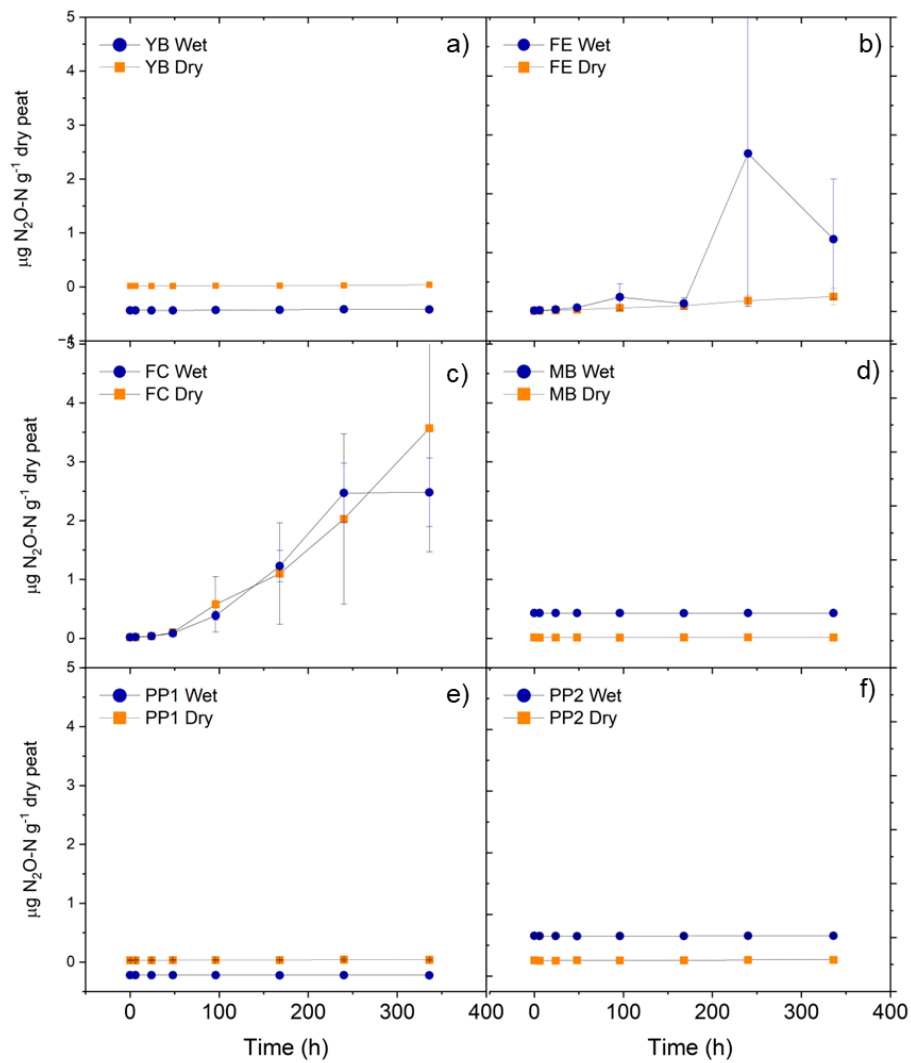

25 **Figure S2.** Mean  $\text{N}_2\text{O}$  production between field moisture (wet) and gradual drying (dry) over time (h) for a two-week incubation period. Panels a-f are ordered from wettest to driest field moisture conditions: (a) young bog (YB), (b) fen edge (FE), (c) fen center (FC), (d) mature bog (MB), (e) peat plateau 1 (PP1), and (f) peat plateau 2 (PP2). Error bars are standard error, n= 4.

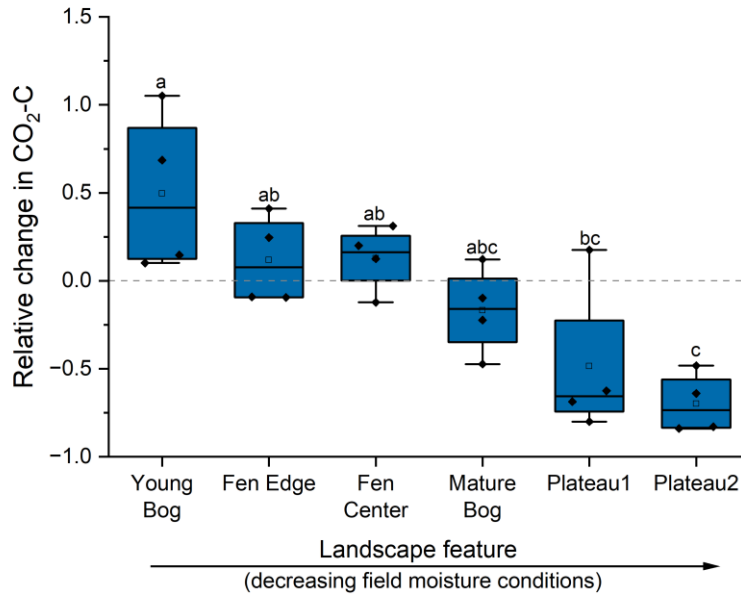

35 **Figure S3.** Relative change in CO<sub>2</sub> production by landscape feature after the two-week incubation ordered from  
 high to low *in situ* peat moisture. Wet treatments were incubated at field moisture conditions, and dry treatments  
 were incubated under gradual drying. For a given landscape feature, the change was calculated as the difference  
 between the total CO<sub>2</sub>-C production of the dried peat samples and those that were held at field moisture (control)  
 conditions, relative to total CO<sub>2</sub>-C production of the wet control sample after two weeks:  $(CO_2 \text{ dried} - CO_2$   
 40  $wet)/CO_2 \text{ wet}$ . Horizontal lines show the median (n=8), open squares are the mean, and boxes show the 25<sup>th</sup> and  
 75<sup>th</sup> percentiles. The dashed horizontal line is the reference zero line indicating no change. Means that do not share  
 a same letter are significantly different.

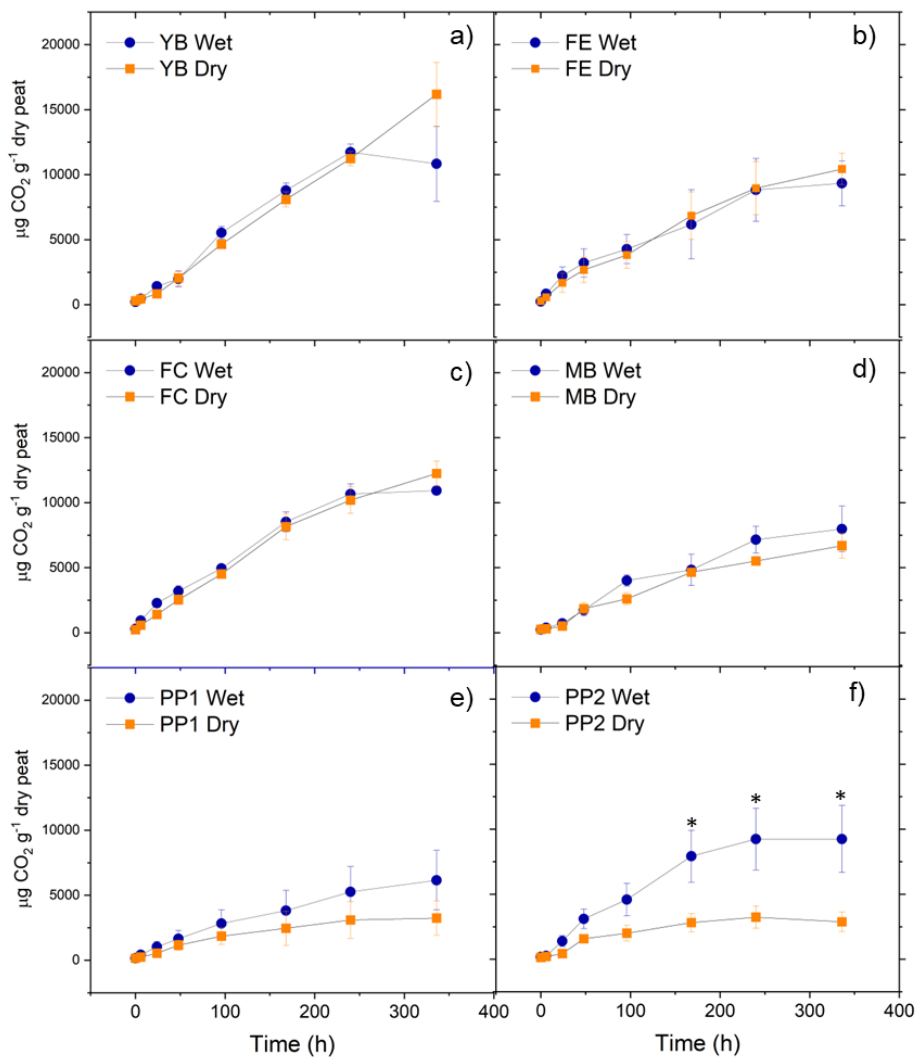

45 **Figure S4.** Mean CO<sub>2</sub> production between field moisture (wet) and gradual drying (dry) over time (h) for a two-week incubation period. Panels a-f are ordered from wettest to driest field moisture conditions: (a) young bog (YB), (b) fen edge (FE), (c) fen center (FC), (d) mature bog (MB), (e) peat plateau 1 (PP1), and (f) peat plateau 2 (PP2). Asterisks indicate significant differences between moisture treatments within a time point. Error bars are standard error, n= 4.
